# Supplementary material
Source: PubMed Central journal article supplement (PMC5986597)
Supplement: NIHMS953171-supplement-Supp_figures.pdf [file NIHMS953171-supplement-Supp_figures.pdf]

Supplementary Figure 1

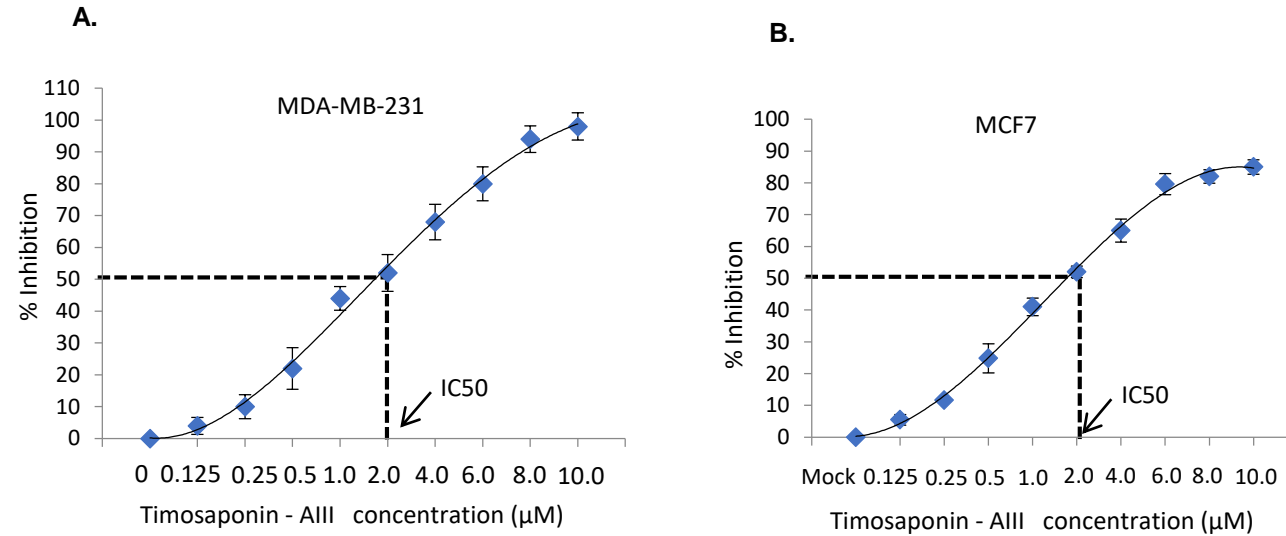

**Dose response curves for determination of IC<sub>50</sub>** MDA-MB-231 (A) and MCF7 cells (B) were treated with increasing doses of Timosaponin A-III for 48 hr and cell viability assessed using MTT assay to determine the IC<sub>50</sub>. The results show IC<sub>50</sub> of 2 μM for both the cell lines. Three independent experiments were performed to calculate the IC<sub>50</sub>. Experiments were performed in triplicates. *Error bars represent ±S.D. \*, p < 0.05*

Supplementary Figure 2

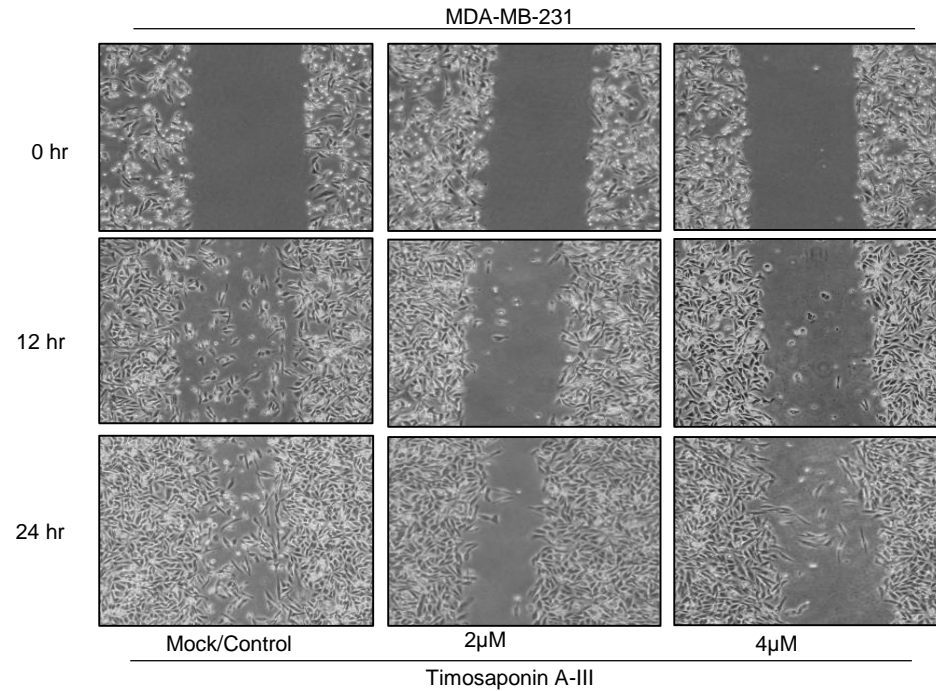

**Determination of the migratory ability of MDA-MB-231 cells treated with TA-III by wound healing assay** MDA-MB-231 cells were grown to near confluence and wounds (scratch) were made with a pipette tip and imaged at 0, 12 and 24 hr to observe the wound healing ability of cells treated with 2 $\mu$ M and 4 $\mu$ M Timosaponin A-III compared to the mock/control cells. While the wound closed by 24 hr in mock/control cells, the cells treated with TA-III either lagged behind or were unable to close the wound.
